# Supplementary material for: K2S4O6: improving birefringence and nonlinear optical properties with the [O3S–S–S–SO3]2− group
Source: Royal Society of Chemistry journal article supplement (doi:10.1039/d2tc03792k), 2022-01-01
Supplement: d2tc03792k1.pdf [file d2tc03792k1.pdf]

## Supporting Information

### **K<sub>2</sub>S<sub>4</sub>O<sub>6</sub>: improving birefringence and nonlinear optical property with [O<sub>3</sub>S-S-S-SO<sub>3</sub>]<sup>2-</sup> group**

Tingting Huang,<sup>a</sup> Yan Xiao, Jiashuo Gu,<sup>a</sup> Ying Wang,<sup>a</sup> Kui Wu,<sup>a</sup> and Bingbing Zhang<sup>\*a</sup>

a. College of Chemistry and Environmental Science, Key Laboratory of Medicinal Chemistry and Molecular Diagnosis of the Ministry of Education, Chemical Biology Key Laboratory of Hebei Province, Hebei University, Baoding 071002, China

**Corresponding Author E-mail:** Prof. B. Zhang [zhangbb@hbu.edu.cn](mailto:zhangbb@hbu.edu.cn)

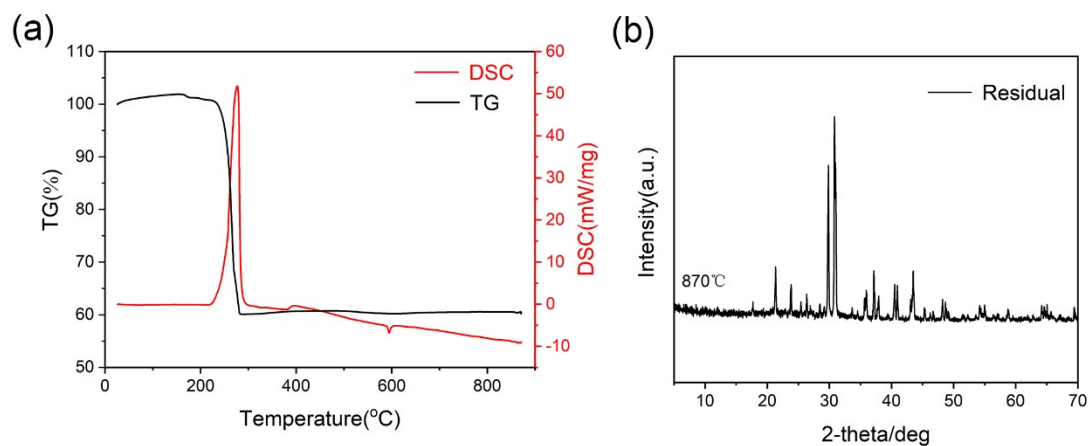

**Figure S1.** (a) The thermogravimetric (TG) and differential scanning calorimetry (DSC) curves of  $K_2S_4O_6$ . (b) The PXRD pattern of residual.

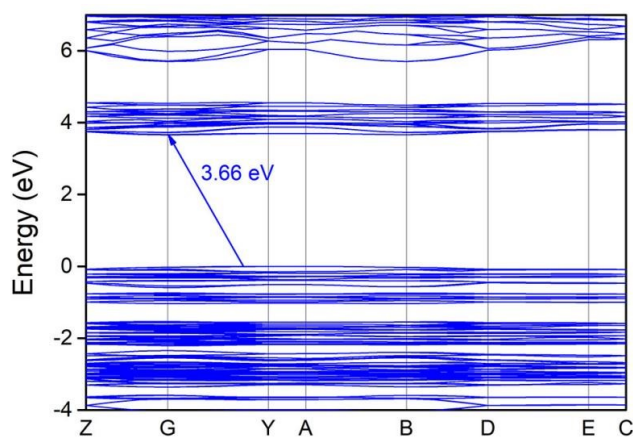

**Figure S2.** The calculated band structure structure of  $K_2S_4O_6$ .

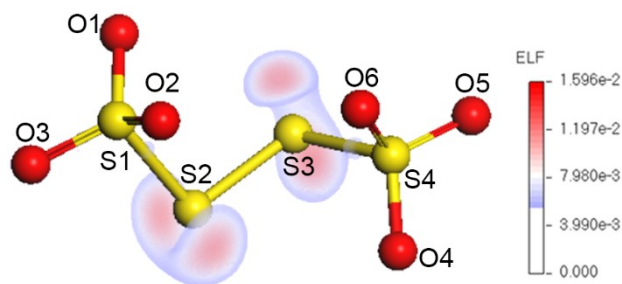

**Figure S3.** The electron localization function (ELF) of  $K_2S_4O_6$ .

**Table S1.** The SHG response, birefringence, and band gap of sulfate NLO materials.

| Compounds                                                                                              | SHG<br>( $\times$ KDP) | Birefringence  | $E_g$  | $E_g$ (Calc.) | Ref. |
|--------------------------------------------------------------------------------------------------------|------------------------|----------------|--------|---------------|------|
| LiNaSO <sub>4</sub>                                                                                    | 1.09                   | N/A            | 3.5    | N/A           | 1    |
| LiKSO <sub>4</sub>                                                                                     | 3                      | N/A            | 4.9    | N/A           | 2    |
| Li <sub>2</sub> SO <sub>4</sub> ·H <sub>2</sub> O                                                      | <1                     | 0.023          | 4.89   | N/A           | 3    |
| Rb <sub>2</sub> Mg <sub>2</sub> (SO <sub>4</sub> ) <sub>3</sub>                                        | 0.3                    | N/A            | >6.2   | 6.05          | 4    |
| Rb <sub>2</sub> Ca <sub>2</sub> (SO <sub>4</sub> ) <sub>3</sub>                                        | 0.3                    | N/A            | <200   | N/A           | 5    |
| Cs <sub>2</sub> Ca <sub>2</sub> (SO <sub>4</sub> ) <sub>3</sub>                                        | 0.6                    | N/A            | 6.2    | 5.95          | 6    |
| Cs <sub>2</sub> Mg <sub>3</sub> (SO <sub>4</sub> ) <sub>4</sub>                                        | 0.4                    | N/A            | <200   | N/A           | 7    |
| Li <sub>8</sub> NaRb <sub>3</sub> (SO <sub>4</sub> ) <sub>6</sub> ·2H <sub>2</sub> O                   | 0.5                    | N/A            | N/A    | 4.86          | 8    |
| NH <sub>4</sub> NaLi <sub>2</sub> (SO <sub>4</sub> ) <sub>2</sub>                                      | 1.1                    | N/A            | <186nm | N/A           | 9    |
| (NH <sub>4</sub> ) <sub>2</sub> Na <sub>3</sub> Li <sub>9</sub> (SO <sub>4</sub> ) <sub>7</sub>        | 0.5                    | N/A            | <190nm | N/A           | 9    |
| Li <sub>9</sub> Na <sub>3</sub> Rb <sub>2</sub> (SO <sub>4</sub> ) <sub>7</sub>                        | 1.3                    | N/A            | 6.70   | N/A           | 10   |
| CsSbF <sub>2</sub> SO <sub>4</sub>                                                                     | 3                      | 0.112          | 4.76   | 4.33          | 11   |
| RbSbCl <sub>2</sub> SO <sub>4</sub>                                                                    | 2.7                    | N/A            | N/A    | 3.48          | 12   |
| K <sub>2</sub> Bi <sub>2</sub> (SO <sub>4</sub> ) <sub>2</sub> Cl <sub>4</sub>                         | 5.5                    | 0.056          | 4.46   | 3.91          | 13   |
| (NH <sub>4</sub> ) <sub>2</sub> Bi <sub>2</sub> (SO <sub>4</sub> ) <sub>2</sub> Cl <sub>4</sub>        | 4.8                    | 0.055          | 5.54   | 3.94          | 13   |
| Rb <sub>2</sub> Bi <sub>2</sub> (SO <sub>4</sub> ) <sub>2</sub> Cl <sub>4</sub>                        | 5.3                    | 0.047          | 4.49   | 3.94          | 13   |
| Ce(SO <sub>4</sub> )F <sub>2</sub>                                                                     | 8                      | 0.361@546 nm   | 2.71   | 1.23          | 14   |
| Te(CS(NH <sub>2</sub> ) <sub>2</sub> ) <sub>4</sub> SO <sub>4</sub> ·2H <sub>2</sub> O                 | 2.4                    | 0.21@546.1 nm  | 3      | 2.949         | 15   |
| Mg[CS(NH <sub>2</sub> ) <sub>2</sub> ] <sub>3</sub> SO <sub>4</sub>                                    | 0.83                   | N/A            | 5.25   | N/A           | 16   |
| Zn[CS(NH <sub>2</sub> ) <sub>2</sub> ] <sub>3</sub> SO <sub>4</sub>                                    | 1.2                    | 0.16@554 nm    | 4.96   | N/A           | 17   |
| (C <sub>6</sub> H <sub>5</sub> NH <sub>3</sub> )HSO <sub>4</sub>                                       | 0.4*Urea               | N/A            | 4.9    | N/A           | 18   |
| Cs <sub>2</sub> Zn <sub>2</sub> (SO <sub>4</sub> ) <sub>3</sub>                                        | 0.15                   | N/A            | 3.49   | 4.46          | 4    |
| RbSbF <sub>2</sub> SO <sub>4</sub>                                                                     | 0.96                   | N/A            | 4.75   | 4.62          | 19   |
| (NH <sub>4</sub> )SbCl <sub>2</sub> SO <sub>4</sub>                                                    | 1.7                    | N/A            | 4.54   | 4.12          | 20   |
| [Ag(NH <sub>3</sub> ) <sub>2</sub> ] <sub>2</sub> SO <sub>4</sub>                                      | 1.4                    | 0.102          | 4.42   | 2.93          | 21   |
| KBiCl <sub>2</sub> SO <sub>4</sub>                                                                     | 1.7                    | 0.098          | 3.95   | 4.34          | 22   |
| KTb(SO <sub>4</sub> ) <sub>2</sub>                                                                     | 0.3                    | 0.019          | 3.04   | N/A           | 23   |
| Sb <sub>4</sub> O(SO <sub>4</sub> )(OH) <sub>2</sub>                                                   | 1.2                    | 0.147          | 3.46   | 4.41          | 24   |
| K <sub>2</sub> Zn <sub>3</sub> (SO <sub>4</sub> )(HSO <sub>4</sub> ) <sub>2</sub> F <sub>4</sub>       | 0.3                    | 0.0126@546 nm  | N/A    | 6.53          | 25   |
| Te <sub>2</sub> O <sub>3</sub> SO <sub>4</sub>                                                         | 6                      | 0.043@546.1 nm | 4.24   | 1.954         | 26   |
| Te(OH) <sub>3</sub> (SO <sub>4</sub> )·H <sub>3</sub> O                                                | 3                      | 0.052@546.1 nm | 4.72   | 4.538         | 26   |
| K <sub>2</sub> SO <sub>4</sub> ·SbF <sub>3</sub>                                                       | 0.1                    | N/A            | 4.44   | N/A           | 27   |
| Rb <sub>2</sub> SO <sub>4</sub> ·SbF <sub>3</sub>                                                      | 0.3                    | N/A            | 4.15   | 4.16          | 27   |
| Y <sub>2</sub> (Te <sub>4</sub> O <sub>10</sub> )(SO <sub>4</sub> )                                    | N/A                    | 0.149@532 nm   | 4.1    | 3.66          | 28   |
| Y <sub>3</sub> (TeO <sub>3</sub> ) <sub>2</sub> (SO <sub>4</sub> ) <sub>2</sub> (OH)(H <sub>2</sub> O) | N/A                    | 0.092@532 nm   | 4.4    | 1.71          | 28   |

N/A = not reported or not available.

**Table S2.** The Mulliken population of bonds in  $K_2S_4O_6$ .

| Bond  | Population | Length(A) |
|-------|------------|-----------|
| S1-O1 | 0.55       | 1.47695   |
| S1-O2 | 0.57       | 1.46362   |
| S1-O3 | 0.56       | 1.47057   |
| S1-S2 | 0.36       | 2.15969   |
| S2-S3 | 0.39       | 2.01894   |
| S3-S4 | 0.36       | 2.17330   |
| S4-O4 | 0.56       | 1.46830   |
| S4-O5 | 0.57       | 1.45955   |
| S4-O6 | 0.57       | 1.46436   |

**Table S3.** The chemical formula, space group, band gap  $E_g$ -GGA and birefringence  $\Delta n$  at 1064 nm (without scissors correction), of different sulfates, thiosulfates and polythionates.

| Crystals                                                           | Space group             | Units                         | Band gap (eV) | Birefringence (@1064 nm) |
|--------------------------------------------------------------------|-------------------------|-------------------------------|---------------|--------------------------|
| LiNaSO <sub>4</sub>                                                | <i>P3c</i>              | SO <sub>4</sub>               | 5.589         | 0.006                    |
| LiKSO <sub>4</sub>                                                 | <i>P3c</i>              | SO <sub>4</sub>               | 5.279         | 0.001                    |
| Li <sub>2</sub> SO <sub>4</sub> ·H <sub>2</sub> O                  | <i>P2<sub>1</sub></i>   | SO <sub>4</sub>               | 4.89          | 0.023                    |
| Na <sub>2</sub> S <sub>2</sub> O <sub>3</sub>                      | <i>P2<sub>1</sub>/a</i> | S <sub>2</sub> O <sub>3</sub> | 4.197         | 0.121                    |
| Na <sub>2</sub> S <sub>2</sub> O <sub>3</sub>                      | <i>Pna2<sub>1</sub></i> | S <sub>2</sub> O <sub>3</sub> | 4.088         | 0.027                    |
| K <sub>2</sub> (S <sub>2</sub> O <sub>3</sub> )                    | <i>P2<sub>1</sub>/c</i> | S <sub>2</sub> O <sub>3</sub> | 3.639         | 0.091                    |
| Cs <sub>2</sub> (S <sub>2</sub> O <sub>3</sub> )                   | <i>P2<sub>1</sub>/c</i> | S <sub>2</sub> O <sub>3</sub> | 3.881         | 0.109                    |
| K <sub>2</sub> (S <sub>3</sub> O <sub>6</sub> )                    | <i>Pnam</i>             | S <sub>3</sub> O <sub>6</sub> | 3.562         | 0.146                    |
| K <sub>2</sub> (S <sub>4</sub> O <sub>6</sub> )                    | <i>Cc</i>               | S <sub>4</sub> O <sub>6</sub> | 3.749         | 0.065                    |
| Na <sub>2</sub> (S <sub>4</sub> O <sub>6</sub> )·2H <sub>2</sub> O | <i>C2<sub>1</sub></i>   | S <sub>4</sub> O <sub>6</sub> | 3.769         | 0.204                    |
| K <sub>2</sub> Ba(S <sub>6</sub> O <sub>6</sub> ) <sub>2</sub>     | <i>P2/c</i>             | S <sub>6</sub> O <sub>6</sub> | 2.743         | 0.206                    |

**Table S4.** Structures, polarizability ( $\alpha$ ), polarizability anisotropy ( $\delta$ ), hyperpolarizability ( $\beta$ ), and HOMO–LUMO gap ( $E_g$ ) of  $(\text{SO}_4)^{2-}$ ,  $(\text{SO}_3\text{S})^{2-}$ ,  $(\text{S}_3\text{O}_6)^{2-}$ ,  $(\text{S}_4\text{O}_6)^{2-}$ , and  $(\text{S}_6\text{O}_6)^{2-}$ .

| Groups                      | Structures                                                                          | $\alpha$                                                                                                                                      | diagonalized<br>$\alpha$                                            | $\delta$ | $\beta$                                                                                                                                                                                                                                           | $E_g$<br>(eV) |
|-----------------------------|-------------------------------------------------------------------------------------|-----------------------------------------------------------------------------------------------------------------------------------------------|---------------------------------------------------------------------|----------|---------------------------------------------------------------------------------------------------------------------------------------------------------------------------------------------------------------------------------------------------|---------------|
| $\text{SO}_4^{2-}$          | 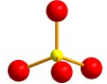   | $\alpha_{xx}=\alpha_{yy}=\alpha_{zz}=32.25$                                                                                                   | $\alpha_{xx}=\alpha_{yy}=\alpha_{zz}=32.25$                         | 0        | $\beta_{xxx}=-3.16,$<br>$\beta_{xyy}=\beta_{xzz}=1.58,$<br>$\beta_{yzz}=-\beta_{yyy}=2.24$                                                                                                                                                        | 7.40          |
| $\text{S}_2\text{O}_3^{2-}$ |    | $\alpha_{xx}=\alpha_{yy}=30.26$<br>$\alpha_{zz}=57.67$                                                                                        | $\alpha_{xx}=\alpha_{yy}=30.26$<br>$\alpha_{zz}=57.67$              | 27.41    | $\beta_{xxy}=-\beta_{yyy}=10.21,$<br>$\beta_{xxz}=\beta_{yyz}=29.40,$<br>$\beta_{zzz}=213.15$                                                                                                                                                     | 6.21          |
| $\text{S}_3\text{O}_6^{2-}$ |    | $\alpha_{xx}=85.40,$<br>$\alpha_{xy}=-16.36,$<br>$\alpha_{yy}=80.34,$<br>$\alpha_{zz}=52.33$                                                  | $\alpha_{xx}=52.33$<br>$\alpha_{yy}=66.32$<br>$\alpha_{zz}=99.43$   | 47.10    | $\beta_{xxx}=58.79,$<br>$\beta_{xxy}=10.31,$<br>$\beta_{xyy}=33.69,$<br>$\beta_{yyy}=73.74,$<br>$\beta_{xxz}=21.20,$<br>$\beta_{yzz}=35.75$                                                                                                       | 6.27          |
| $\text{S}_4\text{O}_6^{2-}$ |  | $\alpha_{xx}=83.35,$<br>$\alpha_{xy}=13.22,$<br>$\alpha_{yy}=112.47,$<br>$\alpha_{xz}=5.38,$<br>$\alpha_{yz}=14.48,$<br>$\alpha_{zz}=73.07$   | $\alpha_{xx}=68.23$<br>$\alpha_{yy}=78.24$<br>$\alpha_{zz}=122.41$  | 54.18    | $\beta_{xxx}=113.94,$<br>$\beta_{xxy}=-32.61,$<br>$\beta_{xyy}=19.75,$<br>$\beta_{yyy}=17.70,$<br>$\beta_{xxz}=-9.51,$<br>$\beta_{xyz}=-10.81,$<br>$\beta_{yyz}=15.93,$<br>$\beta_{xzz}=42.85,$<br>$\beta_{yzz}=-4.84,$<br>$\beta_{zzz}=3.91$     | 5.54          |
| $\text{S}_6\text{O}_6^{2-}$ |  | $\alpha_{xx}=111.89,$<br>$\alpha_{xy}=-14.24,$<br>$\alpha_{yy}=116.49,$<br>$\alpha_{xz}=8.62,$<br>$\alpha_{yz}=9.73,$<br>$\alpha_{zz}=155.70$ | $\alpha_{xx}=96.94$<br>$\alpha_{yy}=128.52$<br>$\alpha_{zz}=158.63$ | 61.69    | $\beta_{xxx}=113.99,$<br>$\beta_{xxy}=-60.05,$<br>$\beta_{xyy}=62.65,$<br>$\beta_{yyy}=-124.19,$<br>$\beta_{xxz}=-6.83,$<br>$\beta_{xyz}=8.66,$<br>$\beta_{yyz}=3.66,$<br>$\beta_{xzz}=107.39,$<br>$\beta_{yzz}=-115.94,$<br>$\beta_{zzz}=104.76$ | 4.59          |

## References

1. R. Punniyamoorthy, R. Manimekalai and G. Pasupathi, *Cryst. Res. Technol.*, 2018, **53**.
2. C. Amirthakumar, B. Valarmathi, P. Pandi and R. M. Kumar, *Chinese. J. Phys.*, 2020, **67**, 305-313.
3. P. Becker, S. Ahrweiler, P. Held, H. Schneeberger and L. Bohatý, *Cryst. Res. Technol.*, 2003, **38**, 881-889.
4. Y. C. Liu, Y. Q. Li, Y. Zhou, Q. R. Ding, Y. X. Chen, S. G. Zhao and J. H. Luo, *Inorg. Chem. Commun.*, 2021, **124**.
5. X. Z. W. E.-Q. S. Y. H. W. X. L. Y. Shen, *Chinese. J. Struc. Chem.*, 2021, **40**, 949-954.
6. Y. Shen, X. Xue, W. Tu, Z. Liu, R. Yan, H. Zhang and J. Jia, *Eur. J. Inorg. Chem.*, 2020, **2020**, 854-858.
7. M. Wang, D. Wei, L. Liang, X. Yan and K. Lv, *Inorg. Chem. Commun.*, 2019, **107**.
8. Y. Li, S. Zhao, P. Shan, X. Li, Q. Ding, S. Liu, Z. Wu, S. Wang, L. Li and J. Luo, *J. Mater. Chem. C.*, 2018, **6**, 12240-12244.
9. Y. Q. Li, F. Liang, S. G. Zhao, L. Li, Z. Y. Wu, Q. R. Ding, S. Liu, Z. S. Lin, M. C. Hong and J. H. Luo, *J. Am. Chem. Soc.*, 2019, **141**, 3833-3837.
10. Y. Q. Li, C. L. Yin, X. Y. Yang, X. J. Kuang, J. Chen, L. H. He, Q. R. Ding, S. G. Zhao, M. C. Hong and J. H. Luo, *Chin. Chem. Soc.*, 2021, **3**, 2298-2306.
11. X. Dong, L. Huang, C. Hu, H. Zeng, Z. Lin, X. Wang, K. M. Ok and G. Zou, *Angew. Chem. Int. Ed.*, 2019, **58**, 6528-6534.
12. F. F. He, Y. L. Deng, X. Y. Zhao, L. Huang, D. J. Gao, J. Bi, X. Wang and G. H. Zou, *J. Mater. Chem. C.*, 2019, **7**, 5748-5754.
13. K. Chen, Y. Yang, G. Peng, S. Yang, T. Yan, H. Fan, Z. Lin and N. Ye, *J. Mater. Chem. C.*, 2019, **7**, 9900-9907.
14. C. Wu, T. H. Wu, X. X. Jiang, Z. J. Wang, H. Y. Sha, L. Lin, Z. S. Lin, Z. P. Huang, X. F. Long, M. G. Humphrey and C. Zhang, *J. Am. Chem. Soc.*, 2021, **143**, 4138-4142.
15. X. Y. Weng, C. S. Lin, G. Peng, H. X. Fan, X. Zhao, K. C. Chen, M. Luo and N. Ye, *Cryst. Growth. Des.*, 2021, **21**, 2596-2601.
16. G. P. P. Philominathan, *Mod. Phys. Lett. B.*, 2009, **23**, 3035 - 3043.
17. J. Ramajothi, S. Dhanuskodi and K. Nagarajan, *Cryst. Res. Technol.*, 2004, **39**, 414-420.
18. N. Sudharsana, G. Subramanian, V. Krishnakumar and R. Nagalakshmi, *Spectrochim. Acta. A.*, 2012, **97**, 798-805.
19. F. Yang, L. J. Huang, X. Y. Zhao, L. Huang, D. J. Gao, J. Bi, X. Wang and G. H. Zou, *J. Mater. Chem. C.*, 2019, **7**, 8131-8138.
20. F. F. He, Q. Wang, C. F. Hu, W. He, X. Y. Luo, L. Huang, D. J. Gao, J. Bi, X. Wang and G. H. Zou, *Cryst. Growth. Des.*, 2018, **18**, 6239-6247.
21. Y. C. Yang, X. Liu, J. Lu, L. M. Wu and L. Chen, *Angew. Chem. Int. Ed.*,

- 2021, **2104**, 07920.
22. Z. H. Yue, Z. T. Lu, H. G. Xue and S. P. Guo, *Cryst. Growth. Des.*, 2019, **19**, 3843-3850.
  23. Q. Wu, C. Yang, J. Ma, F. Liang, C. L. Teng and Y. S. Du, *Inorg. Chem.*, 2021, **60**, 15041-15047.
  24. Q. Wei, K. Wang, C. He, L. Wei, X. F. Li, S. Zhang, X. T. An, J. H. Li and G. M. Wang, *Inorg. Chem.*, 2021, **60**, 11648-11654.
  25. Y. Zhou, X. Y. Zhang, Z. Y. Xiong, X. F. Long, Y. Q. Li, Y. X. Chen, X. Chen, S. G. Zhao, Z. S. Lin and J. H. Luo, *J. Phys. Chem. Lett.*, 2021, **12**, 8280-8284.
  26. Y. X. Song, X. Hao, C. S. Lin, D. H. Lin, M. Luo and N. Ye, *Inorg. Chem.*, 2021, **60**, 11412-11418.
  27. F. He, L. Wang, C. Hu, J. Zhou, Q. Li, L. Huang, D. Gao, J. Bi, X. Wang and G. Zou, *Dalton. Trans.*, 2018, **47**, 17486-17492.
  28. P. F. Li, C. L. Hu, F. Kong, S. M. Ying and J. G. Mao, *Inorg. Chem. Front.*, 2021, **8**, 164-172.
